# Supplementary material for: Tungsten Catalysts for Visible Light Driven Ofloxacin Photocatalytic Degradation and Hydrogen Production
Source: MDPI journal article supplement (doi:10.3390/catal12030310), 2022-03-09
Supplement: s1 [file s1]

## Supporting informations

### **Tungsten catalysts for visible light driven photocatalytic degradation and hydrogen production**

Dhanalakshmi Vadivel,<sup>1,2,\*</sup> Michela Sturini,<sup>3</sup> Andrea Speltini<sup>3</sup> and Daniele Dondi<sup>1,2</sup>

#### **S.1. Preliminary photocatalytic experiment**

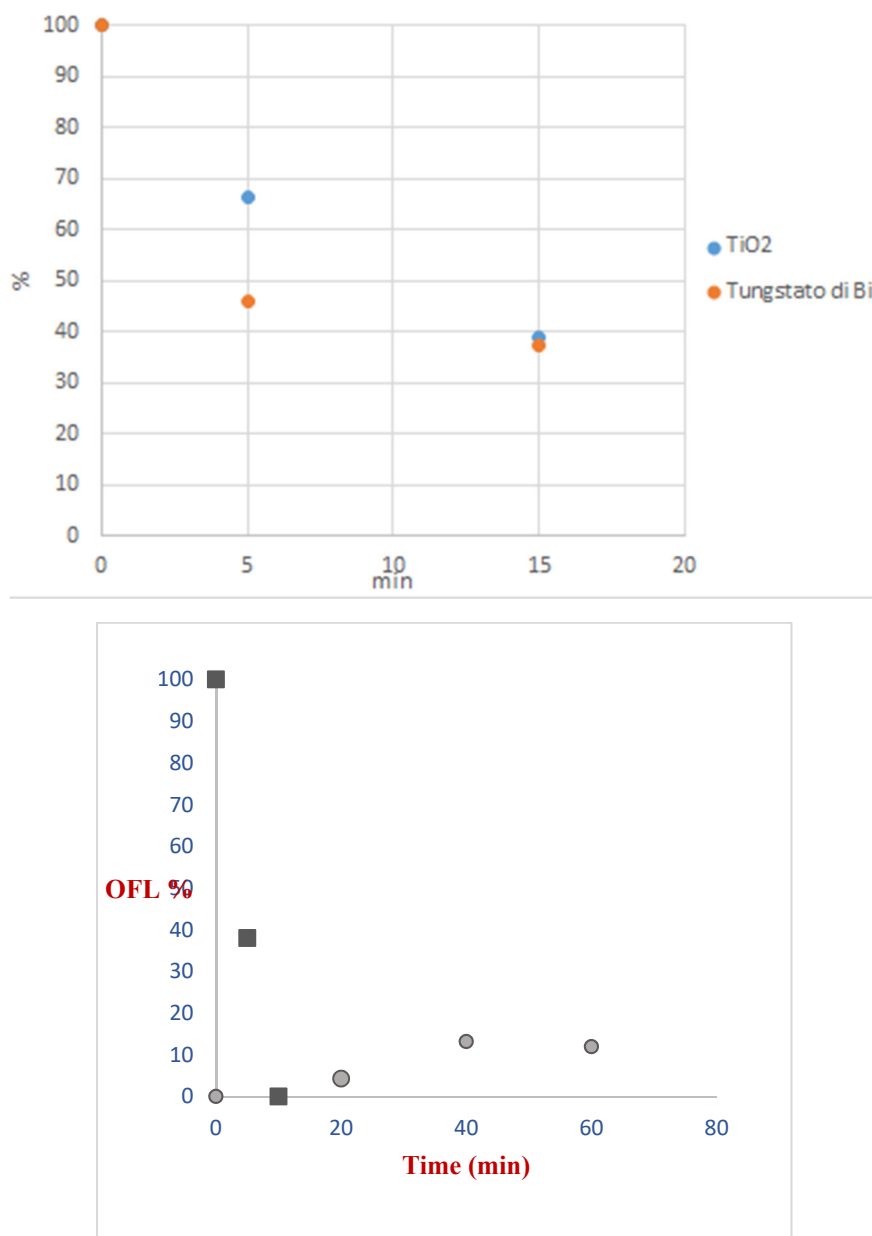

**Figure S1.** Preliminary photocatalytic experiment (50  $\mu\text{g L}^{-1}$  OFL, 0.5 mg L<sup>-1</sup> BT), and OFL adsorption in the dark (50  $\mu\text{g L}^{-1}$  OFL, 0.5 mg L<sup>-1</sup> BT).

#### **S.2. Scanning Electron Microscopic images OF TBADT**

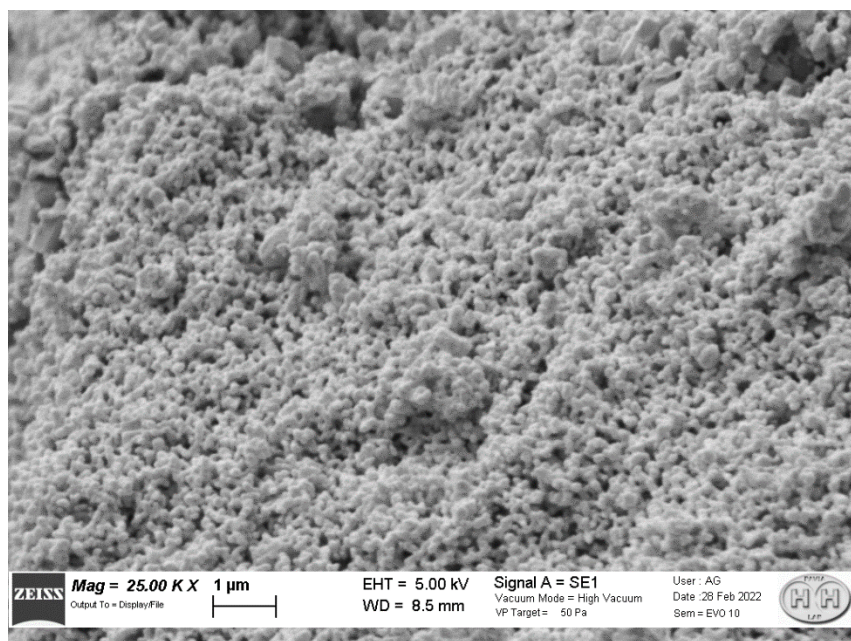

**Figure S2.** Scanning Electron Microscopic image of catalyst TBADT.

### S.3. Scanning Electron Microscopic images of BT

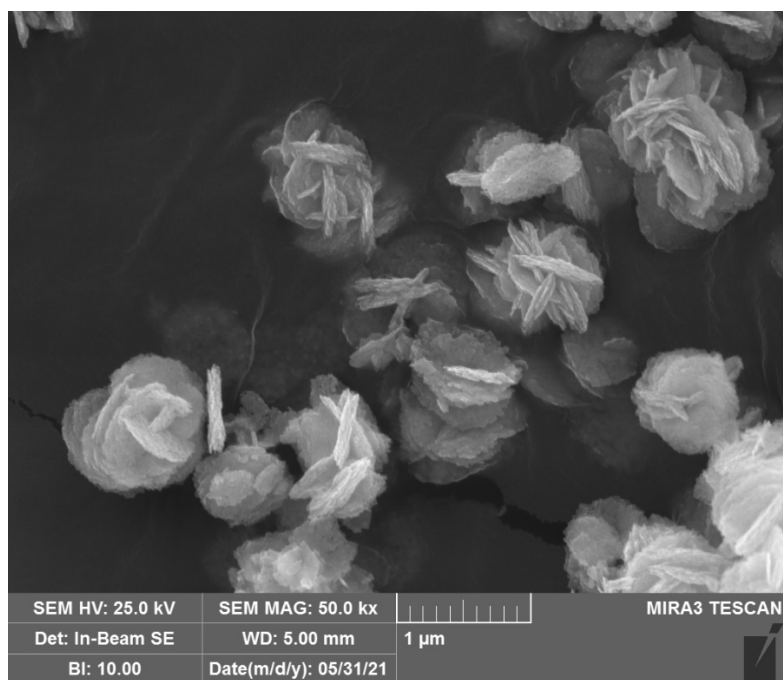

**Figure S3.** Scanning Electron Microscopic image of catalyst TBADT.

#### S.4. FT-IR of TBADT catalyst

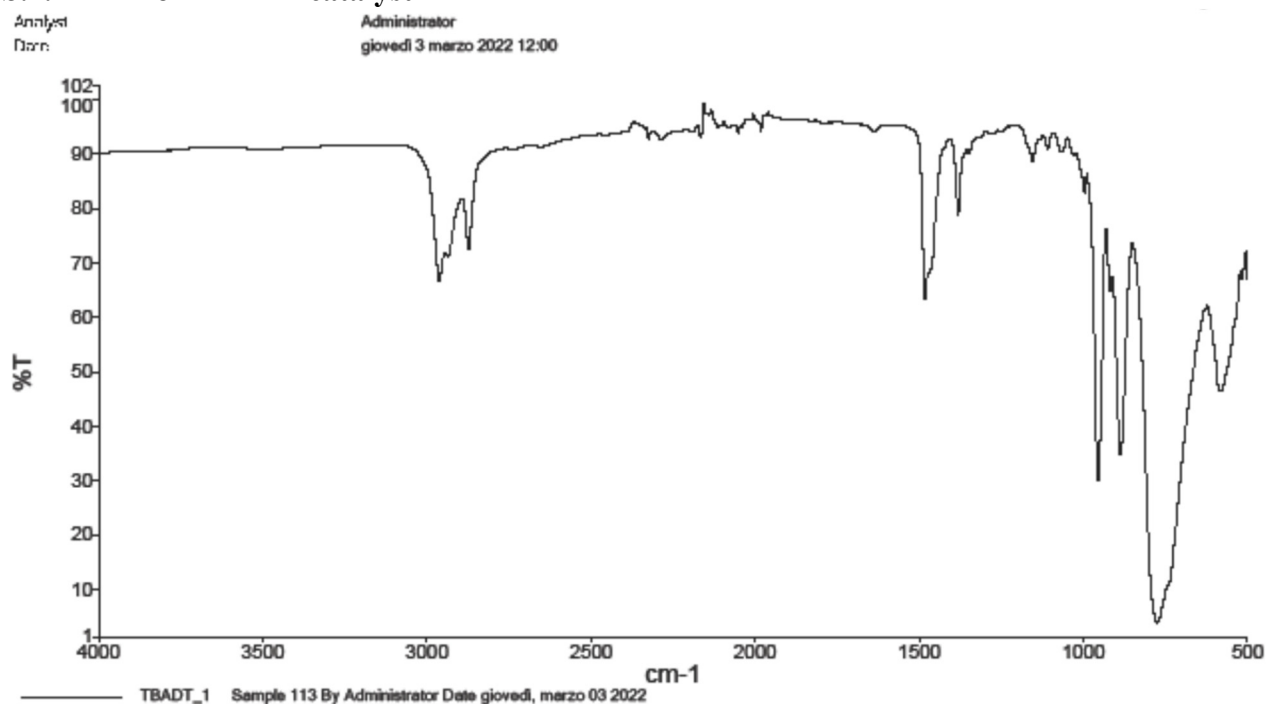

Figure S4. FT-IR of catalyst TBADT.

#### S.5. FT-IR of BT catalyst

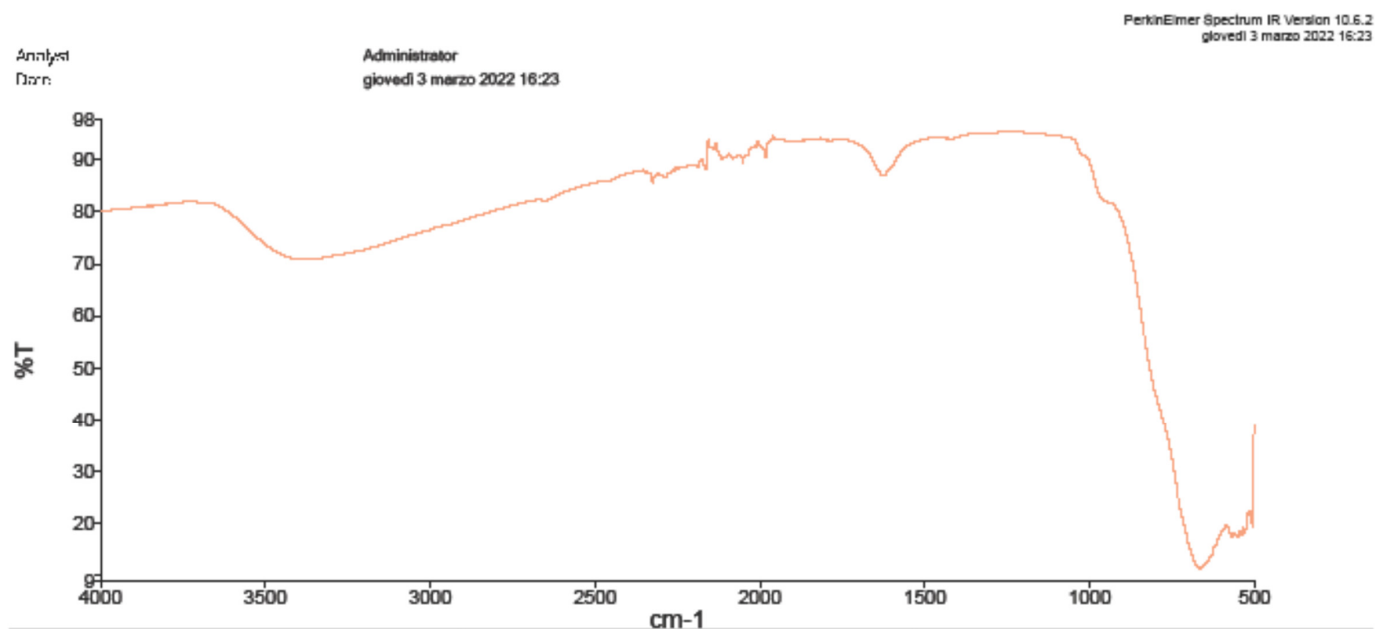

Figure S5. FT-IR of catalyst BT.

### S.6. Tauc plot for TBADT catalyst

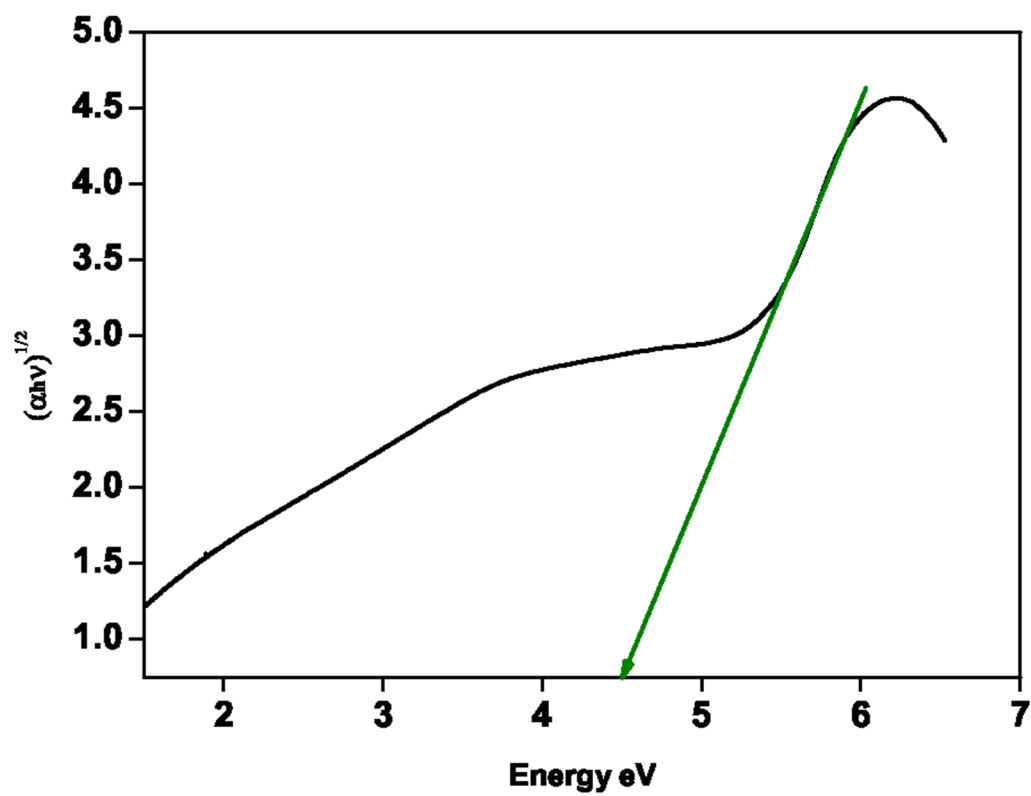

Figure S6. Tauc plot for TBADT catalyst for the bang-gap calculation

### S.7. Tauc plot for BT catalyst

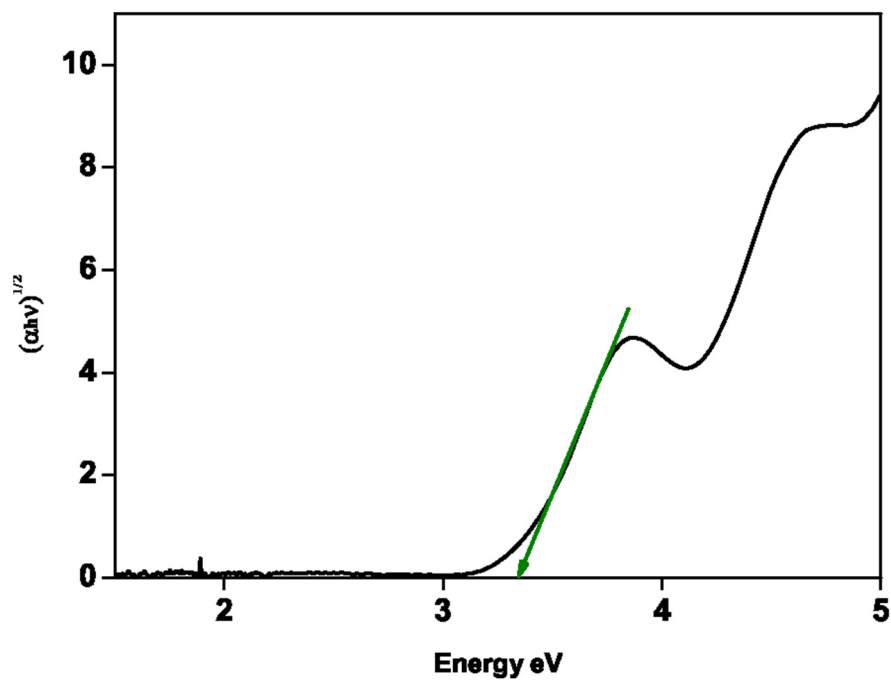

Figure S7. Tauc plot for BT catalyst for the bang-gap calculation.

S.8. EDX for TBADT catalyst

| Element | App   | Intensity | Weight% | Weight% | Atomic% |
|---------|-------|-----------|---------|---------|---------|
|         | Conc. | Corrn.    |         | Sigma   |         |
| C K     | 21.76 | 0.6240    | 26.77   | 0.85    | 59.32   |
| O K     | 16.14 | 0.6366    | 19.47   | 0.62    | 32.40   |
| Na K    | 0.25  | 1.0418    | 0.19    | 0.11    | 0.22    |
| Cl K    | 0.41  | 0.6193    | 0.51    | 0.10    | 0.38    |
| W M     | 61.36 | 0.8877    | 53.07   | 0.76    | 7.68    |
| Totals  |       |           | 100.00  |         |         |

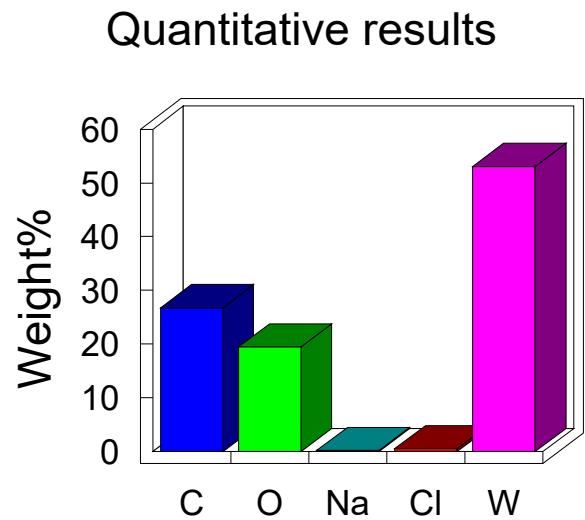

Standard :

C CaCO3 1-Jun-1999 12:00 AM  
O SiO2 1-Jun-1999 12:00 AM  
Na Albite 1-Jun-1999 12:00 AM  
Cl KCl 1-Jun-1999 12:00 AM  
W W 1-Jun-1999 12:00 AM

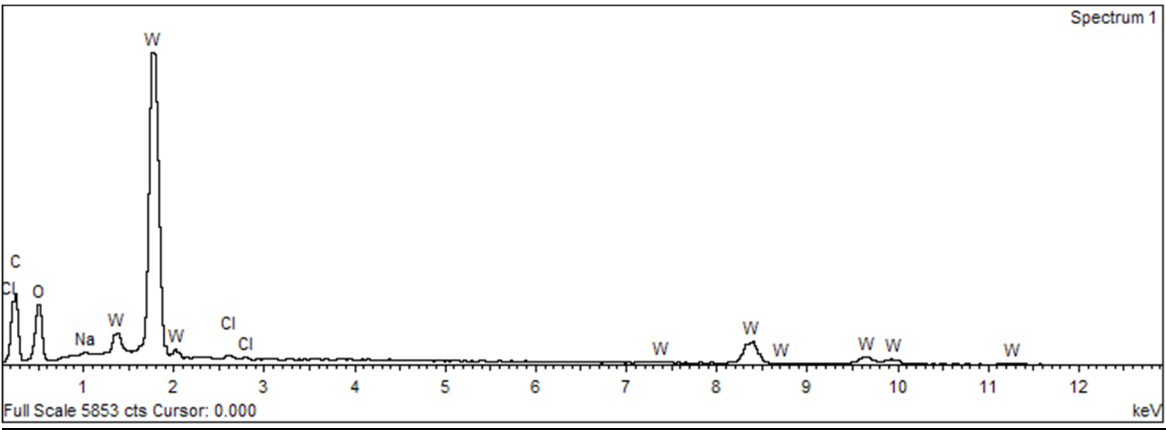

Figure S8. EDX of catalyst TBADT
